# Supplementary material for: Ytterbium-Doped Lead–Halide Perovskite Nanocrystals: Synthesis, Near-Infrared Emission, and Open-Source Machine Learning Model for Prediction of Optical Properties
Source: MDPI journal article supplement (doi:10.3390/nano13040744), 2023-02-16
Supplement: s1 [file s1]

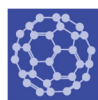

## Supplementary Materials

# Ytterbium-Doped Lead–Halide Perovskite Nanocrystals: Synthesis, Near-Infrared Emission, and Open-Source Machine Learning Model for Prediction of Optical Properties

Yuliya A. Timkina <sup>1</sup>, Vladislav S. Tuchin <sup>1</sup>, Aleksandr P. Litvin <sup>1,2</sup>, Elena V. Ushakova <sup>1,\*</sup> and Andrey L. Rogach <sup>3</sup><sup>1</sup> International Research and Education Centre for Physics of Nanostructures, ITMO University, Saint Petersburg 197101, Russia<sup>2</sup> Laboratory of Quantum Processes and Measurements, ITMO University, Saint Petersburg 197101, Russia<sup>3</sup> Department of Materials Science and Engineering & Centre for Functional Photonics (CFP), City University of Hong Kong, Hong Kong SAR 999077, China

\* Correspondence: elena.ushakova@itmo.ru

**Table S1.** Experimental parameters for the synthesis of Yb-doped CsPbCl<sub>3</sub> pNCs taken from Refs. [15,23,26,45,46,56–58] (see main text).

| Chemical formula                  | DOI                          | Pb_mmol | Yb_mmol | OlAm_mL | OlAc_mL | temperature_°C | time_sec |
|-----------------------------------|------------------------------|---------|---------|---------|---------|----------------|----------|
| Yb:CsPbCl <sub>3</sub>            | 10.1039/c8tc03957g           | 0.12    | 0.38    | 2       | 2       | 260            | 5        |
| Yb:CsPbCl <sub>3</sub>            | 10.1021/acs.nanolett.8b05104 | 0.2     | 0.08    | 0.5     | 1       | 240            | 1        |
| Yb:CsPbCl <sub>3</sub>            | 10.1021/acs.nanolett.8b01066 | 0.2     | 0.16    | 0.5     | 1       | 240            | 1        |
| Yb:CsPbCl <sub>3</sub>            | 10.1021/acs.nanolett.7b04575 | 0.38    | 0.19    | 1       | 1       | 240            | 30       |
| Yb:CsPbCl <sub>3</sub> :Mn(2.17%) | 10.1002/advs.202001317       | 0.2     | 0.02    | 1       | 0.5     | 200            | 10       |
| Yb:CsPbCl <sub>3</sub> :Mn(1.45%) | 10.1002/advs.202001317       | 0.2     | 0.04    | 1       | 0.5     | 200            | 10       |
| Yb:CsPbCl <sub>3</sub> :Mn(1.3%)  | 10.1002/advs.202001317       | 0.2     | 0.06    | 1       | 0.5     | 200            | 10       |
| Yb:CsPbCl <sub>3</sub> :Mn(1.14%) | 10.1002/advs.202001317       | 0.2     | 0.08    | 1       | 0.5     | 200            | 10       |
| Yb:CsPbCl <sub>3</sub>            | 10.1021/acs.jpcc.9b01296     | 0.4     | 0.32    | 1       | 2       | 240            | 1        |
| Yb:CsPbCl <sub>3</sub>            | 10.1021/acsami.1c09421       | 0.2     | 0.09    | 1       | 3       | 240            | 1        |

**Table S2.** Comparison of the predicted and experimental quantum yields Yb-doped CsPbCl<sub>3</sub> in the NIR spectral region reported in Refs. [15,23,26,45,46,56–58] (see main text).

| Chemical formula                  | DOI                          | Prediction of NIR | Experimental NIR | Absolute difference_ % |
|-----------------------------------|------------------------------|-------------------|------------------|------------------------|
|                                   |                              | QY_ %             | QY_ %            |                        |
| Yb:CsPbCl <sub>3</sub>            | 10.1039/c8tc03957g           | 124.3             | 120.1            | 4.2                    |
| Yb:CsPbCl <sub>3</sub>            | 10.1021/acs.nanolett.8b05104 | 132.6             | 114              | 18.6                   |
| Yb:CsPbCl <sub>3</sub>            | 10.1021/acs.nanolett.8b01066 | 155.7             | 170              | 14.3                   |
| Yb:CsPbCl <sub>3</sub>            | 10.1021/acs.nanolett.7b04575 | 145.4             | 142.7            | 2.7                    |
| Yb:CsPbCl <sub>3</sub> :Mn(2.17%) | 10.1002/adv.202001317        | 55.4              | 32.5             | 22.9                   |
| Yb:CsPbCl <sub>3</sub> :Mn(1.45%) | 10.1002/adv.202001317        | 61.2              | 64.6             | 3.4                    |
| Yb:CsPbCl <sub>3</sub> :Mn(1.3%)  | 10.1002/adv.202001317        | 67                | 103.3            | 36.3                   |
| Yb:CsPbCl <sub>3</sub> :Mn(1.14%) | 10.1002/adv.202001317        | 72.8              | 66.3             | 6.5                    |
| Yb:CsPbCl <sub>3</sub>            | 10.1021/acs.jpcc.9b01296     | 147.3             | 146              | 1.3                    |
| Yb:CsPbCl <sub>3</sub>            | 10.1021/acsami.1c09421       | 105.7             | 110              | 4.3                    |

**Table S3.** Linear regression coefficients for variables used in the model equation:.

$$\text{NIR PL QY (\%)} = \beta_1 \cdot \text{Pb}_{\text{mmol}} + \beta_2 \cdot \text{Yb}_{\text{mmol}} + \beta_3 \cdot \text{OlAm}_{\text{mL}} + \beta_4 \cdot \text{OlAc}_{\text{mL}} + \beta_5 \cdot \text{temperature}_{\text{°C}} + \beta_6 \cdot \text{time}_{\text{sec}}$$

| Coefficient | Variables      | Value  |
|-------------|----------------|--------|
| $\beta_1$   | Pb_mmol        | −93.47 |
| $\beta_2$   | Yb_mmol        | 289.10 |
| $\beta_3$   | OlAm_mL        | −84.18 |
| $\beta_4$   | OlAc_mL        | 6.14   |
| $\beta_5$   | temperature_°C | 0.68   |
| $\beta_6$   | time_sec       | 1.38   |
